# Supplementary material
Source: publisher figshare collection journal article supplement (https://acs.figshare.com/ndownloader/files/3871219)
Supplement: Supplementary file 1 [file 3871219]

# Supporting Information

## **Aerosol Jet Printed p- and n-type Electrolyte Gated Transistors with a Variety of Electrode Materials: Exploring Practical Routes to Printed Electronics**

*Kihyon Hong<sup>1</sup>, Se Hyun Kim<sup>1,2</sup>, Ankit Mahajan<sup>1</sup>, and C. Daniel Frisbie<sup>1,\*</sup>*

<sup>1</sup>Department of Chemical Engineering & Materials Science, University of Minnesota, 421 Washington Ave. SE, Minneapolis, MN 55455 (USA)

<sup>2</sup>Department of Advanced Organic Materials Engineering, Yeungnam University, 280 Daehak-ro, Gyeongsan, 712-749 (Korea)

\*Email: [frisbie@umn.edu](mailto:frisbie@umn.edu)

(a)

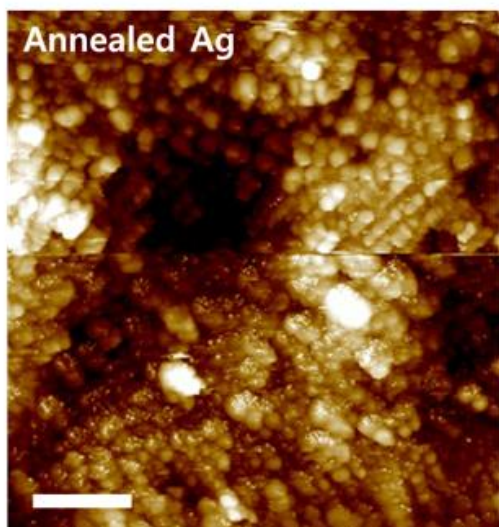

(b)

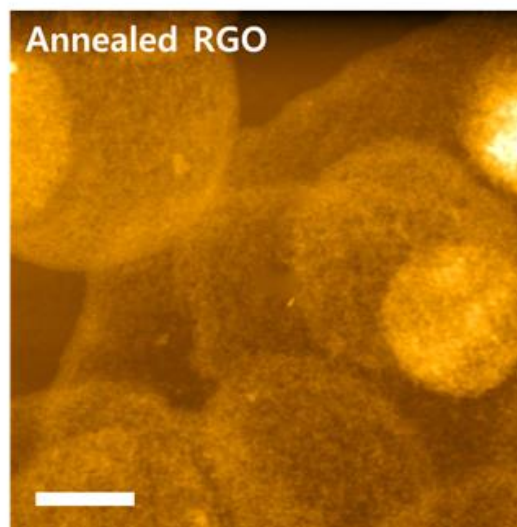

**Figure S1.** AFM height images of (a) annealed Ag and (b) annealed RGO samples. Scalebar: 1  $\mu\text{m}$

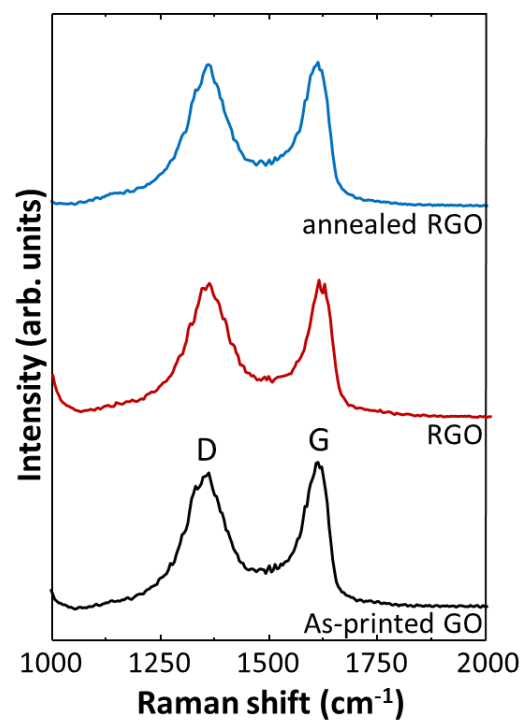

**Figure S2.** Raman spectra of as-printed GO, RGO, and annealed RGO samples.

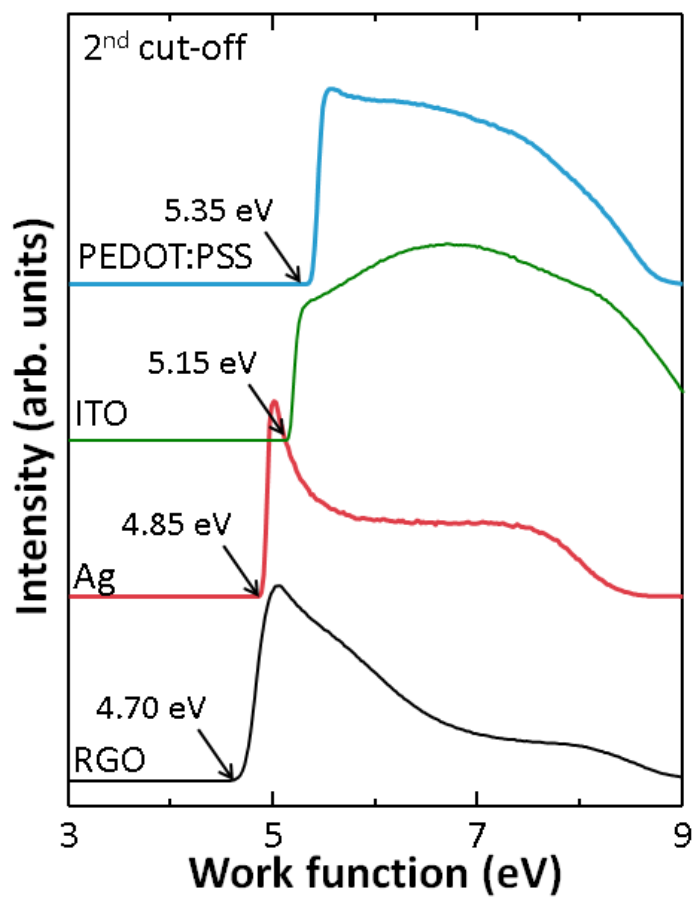

**Figure S3.** Secondary cutoff spectra of printed S-D electrode materials using a UPS He I (21.2 eV) line. The arrows indicate the measured work function values.
